# Supplementary material for: Neutralization Properties of Simian Immunodeficiency Viruses Infecting Chimpanzees and Gorillas
Source: PubMed Central journal article supplement — mBio. 2015 Apr 21;6(2):e00296-15. doi: 10.1128/mBio.00296-15 (PMC4453581; doi:10.1128/mbio.00296-15), 2015-04-21
Supplement: mbo002152274st1.pdf [file mbo002152274st1.pdf]

| TABLE S1                    | Neutralization Potency (nM) in TZM-bl Cells |       |       |           |       |       |       |       |       |        |        |       |           |        |        |       |                             |
|-----------------------------|---------------------------------------------|-------|-------|-----------|-------|-------|-------|-------|-------|--------|--------|-------|-----------|--------|--------|-------|-----------------------------|
|                             | HIV-1                                       |       |       | SIVcpzPtt |       |       |       |       |       | SIVgor |        |       | SIVcpzPts |        |        |       | Geometric Mean <sup>a</sup> |
|                             | SG3                                         | YU-2  | JRCSF | GAB-1     | GAB-2 | EK505 | LB715 | MB897 | MT145 | CP2139 | BF1167 | TAN-1 | TAN-2     | TAN-3  | TAN-13 |       |                             |
| <b>CD4bs</b>                |                                             |       |       |           |       |       |       |       |       |        |        |       |           |        |        |       |                             |
| VRC-01                      | 0.29                                        | 0.84  | 2.81  | >67       | >67   | >67   | >67   | >67   | >67   | >67    | >67    | >67   | >67       | >67    | >67    | >67   | 0%                          |
| VRC-03                      | 0.3                                         | 0.22  | 0.63  | >67       | >67   | >67   | >67   | >67   | >67   | >67    | >67    | >67   | >67       | >67    | >67    | >67   | 0%                          |
| VRC-PG04                    | 0.45                                        | 0.76  | 2.07  | >67       | >67   | >67   | >67   | >67   | >67   | >67    | >67    | >67   | >67       | >67    | >67    | >67   | 0%                          |
| VRC-CH30                    | 6.73                                        | 1.09  | 3.07  | >67       | >67   | >67   | >67   | >67   | >67   | >67    | >67    | >67   | >67       | >67    | >67    | >67   | 0%                          |
| VRC-CH31                    | 7.89                                        | 0.65  | 1.28  | >67       | >67   | >67   | >67   | >67   | >67   | >67    | >67    | >67   | >67       | >67    | >67    | >67   | 0%                          |
| F105                        | 5.3                                         | >67   | >67   | >67       | >67   | >67   | >67   | >67   | >67   | >67    | >67    | >67   | >67       | >67    | >67    | >67   | 0%                          |
| b13                         | 22.2                                        | >67   | >67   | >67       | >67   | >67   | >67   | >67   | >67   | >67    | >67    | >67   | >67       | >67    | >67    | >67   | 0%                          |
| NIH45-46G54W                | 0.02                                        | 0.16  | 0.41  | >67       | >67   | >67   | >67   | >67   | >67   | >67    | >67    | >67   | >67       | >67    | >67    | >67   | 0%                          |
| 45-46m2                     | 0.14                                        | 0.28  | 0.71  | >67       | >67   | >67   | >67   | >67   | >67   | >67    | >67    | >67   | >67       | >67    | >67    | >67   | 0%                          |
| 45-46m7                     | 1.06                                        | 0.34  | 0.78  | >67       | >67   | >67   | >67   | >67   | >67   | >67    | >67    | >67   | >67       | >67    | >67    | >67   | 0%                          |
| <b>MPER</b>                 |                                             |       |       |           |       |       |       |       |       |        |        |       |           |        |        |       |                             |
| 4E10                        | 6.68                                        | >67   | 24.06 | 7.94      | 14.25 | 15.97 | 12.63 | 16.30 | 17.93 | >67    | 32.93  | 62.30 | >67       | 15.26  | >67    | 18.10 | 75%                         |
| 10E8                        | 5.67                                        | 19.27 | 3.07  | 0.20      | 1.53  | 7.27  | 0.87  | 7.20  | 7.20  | 34.20  | 6.20   | 7.20  | 9.40      | 1.47   | 24.40  | 4.39  | 100%                        |
| <b>Glycan-dependent</b>     |                                             |       |       |           |       |       |       |       |       |        |        |       |           |        |        |       |                             |
| PG9                         | >67                                         | 16.33 | 0.06  | 0.69      | >67   | 3.19  | >67   | 0.63  | 0.51  | >67    | >67    | 38.30 | >67       | >67    | >67    | 1.93  | 42%                         |
| PG16                        | >67                                         | 0.55  | 0.01  | 0.07      | >67   | 2.58  | >67   | 0.32  | 0.15  | >67    | >67    | >67   | >67       | >67    | >67    | 0.30  | 33%                         |
| PGT145                      | >67                                         | 3.50  | 0.22  | 3.85      | >67   | 0.39  | >67   | 1.93  | 6.64  | 13.28  | >67    | >67   | >67       | >67    | >67    | 3.03  | 42%                         |
| 10-1074                     | 0.86                                        | 1.81  | 0.83  | >67       | >67   | >67   | >67   | >67   | >67   | >67    | >67    | >67   | >67       | >67    | >67    | >67   | 0%                          |
| PGT121                      | 0.97                                        | 1.05  | 0.63  | >67       | >67   | >67   | >67   | >67   | >67   | >67    | >67    | >67   | >67       | >67    | >67    | >67   | 0%                          |
| PGT128                      | >67                                         | 1.01  | 0.11  | >67       | >67   | 0.13  | >67   | >67   | >67   | >67    | >67    | >67   | >67       | >67    | >67    | 0.13  | 8%                          |
| PGT135                      | 0.77                                        | >67   | 6.61  | >67       | >67   | >67   | >67   | >67   | >67   | >67    | >67    | >67   | >67       | >67    | >67    | >67   | 0%                          |
| 2G12                        | 4.63                                        | >67   | 6.92  | >67       | >67   | >67   | >67   | >67   | >67   | >67    | >67    | >67   | >67       | >67    | >67    | >67   | 0%                          |
| 8ANC195                     | 8.67                                        | 7.80  | >67   | >67       | >67   | >67   | >67   | >67   | >67   | >67    | >67    | >67   | >67       | >67    | >67    | >67   | 0%                          |
| 35O22                       | 0.87                                        | >67   | >67   | >67       | >67   | >67   | 3.33  | >67   | >67   | >67    | >67    | >67   | >67       | >67    | >67    | >67   | 8%                          |
| PGT151                      | 0.13                                        | 14.07 | 0.47  | >67       | >67   | >67   | >67   | >67   | >67   | >67    | >67    | >67   | >67       | >67    | >67    | >67   | 0%                          |
| PGT152                      | 0.20                                        | 2.00  | >67   | >67       | >67   | >67   | >67   | >67   | >67   | >67    | >67    | >67   | >67       | >67    | >67    | >67   | 0%                          |
| PGT158                      | 0.60                                        | >67   | >67   | >67       | >67   | >67   | >67   | >67   | >67   | >67    | >67    | >67   | >67       | >67    | >67    | >67   | 0%                          |
| <b>Llama</b>                |                                             |       |       |           |       |       |       |       |       |        |        |       |           |        |        |       |                             |
| JM4                         | 36.03                                       | 67.17 | 6.82  | 7.20      | >100  | >100  | >100  | >100  | >100  | >100   | >100   | >100  | >100      | >100   | >100   | 7.20  | 8%                          |
| J3                          | 0.21                                        | 1.35  | 10.52 | 1.47      | 38.65 | >100  | 38.07 | >100  | >100  | >100   | >100   | >100  | >100      | >100   | >100   | 12.92 | 25%                         |
| 3E3                         | 0.27                                        | 0.22  | 12.42 | 1.61      | 27.96 | >100  | 10.83 | 10.60 | >100  | >100   | >100   | >100  | >100      | >100   | >100   | 8.48  | 33%                         |
| 2E7                         | 11.44                                       | >100  | 46.63 | >100      | 20.14 | 92.89 | 20.42 | >100  | 42.66 | >100   | 55.84  | >100  | >100      | >100   | >100   | 39.07 | 42%                         |
| 11F1F                       | 11.62                                       | >100  | 47.42 | >100      | 21.24 | 91.12 | 22.56 | >100  | 43.52 | >100   | 54.79  | >100  | >100      | >100   | >100   | 40.13 | 42%                         |
| Bi-2H10                     | 61.42                                       | >75   | 34.44 | >75       | >75   | >75   | >75   | >75   | >75   | >75    | >75    | >75   | >75       | >75    | >75    | >75   | 0%                          |
| <b>Anti-receptor</b>        |                                             |       |       |           |       |       |       |       |       |        |        |       |           |        |        |       |                             |
| iMab                        | >67                                         | >67   | 0.46  | 34.21     | 0.86  | 58.49 | 0.69  | 0.36  | 0.48  | >67    | 22.40  | 0.98  | 23.83     | 0.68   | 0.96   | 2.76  | 92%                         |
| LM52                        | >67                                         | 0.64  | 0.23  | 1.59      | 0.50  | 0.25  | 0.23  | 0.22  | 0.43  | 22.53  | 0.46   | 0.35  | 1.17      | 0.76   | 3.21   | 0.77  | 100%                        |
| PRO140                      | >67                                         | 2.61  | 23.81 | 2.16      | 0.68  | 0.80  | 4.87  | 1.57  | 1.02  | 3.07   | 1.41   | 7.97  | 15.46     | 1.12   | 3.43   | 2.27  | 100%                        |
| PG9-iMab                    | >48                                         | 35.32 | 0.10  | 2.56      | 0.15  | 0.15  | 2.08  | 0.85  | 0.04  | >48    | 0.09   | 1.13  | 3.21      | 0.67   | >48    | 0.50  | 83%                         |
| PG16-iMab                   | >48                                         | 5.54  | 0.13  | 19.68     | 0.16  | 0.51  | 27.24 | 2.12  | 0.04  | >48    | 0.15   | 5.51  | 5.94      | 0.83   | >48    | 1.31  | 83%                         |
| LM52-PGT128                 | >48                                         | 0.28  | 0.14  | 2.09      | 0.02  | 1.94  | 0.91  | 0.67  | 0.12  | 7.49   | 0.37   | 0.95  | 0.32      | 0.33   | 22.52  | 0.75  | 100%                        |
| PRO140-10E8                 | 0.14                                        | 1.65  | 0.61  | 0.12      | 0.08  | 0.03  | 0.17  | 0.10  | 0.10  | 0.37   | 0.03   | 0.34  | 0.44      | 0.10   | 0.52   | 0.13  | 100%                        |
| <b>CD4-based</b>            |                                             |       |       |           |       |       |       |       |       |        |        |       |           |        |        |       |                             |
| sCD4                        | 3.05                                        | 16.97 | 155.3 | 4.23      | 9.70  | >244  | 126.9 | >244  | 32.12 | 90.61  | 21.07  | 221.2 | 58.27     | 112.79 | 130.21 | 47.66 | 83%                         |
| CD4-Ig                      | 0.21                                        | 2.70  | 24.29 | 1.19      | 4.40  | 84.74 | 79.09 | 94.40 | 12.11 | 33.46  | 6.31   | >109  | 19.14     | 78.49  | 76.79  | 23.05 | 92%                         |
| PRO542                      | 0.03                                        | 0.55  | 5.33  | 0.36      | 1.41  | 41.60 | 36.81 | >47   | 2.06  | 7.18   | 1.85   | >47   | 4.82      | 12.62  | 11.85  | 5.24  | 83%                         |
| CD4-anti-HSV-gD             | 7.50                                        | 41.57 | 30.89 | 19.84     | 38.81 | 40.90 | 25.87 | 36.19 | 42.02 | 46.19  | 34.57  | 42.00 | 42.30     | 30.28  | 43.37  | 35.92 | 100%                        |
| CD4-GS7-E51                 | 1.01                                        | >50   | 21.03 | >50       | >50   | >50   | >50   | >50   | >50   | >50    | >50    | >50   | >50       | >50    | >50    | >50   | 0%                          |
| CD4-L1-E51                  | 0.20                                        | 0.35  | 29.31 | 0.85      | 2.69  | >50   | 16.93 | >50   | 4.36  | 4.80   | 15.63  | >50   | 1.75      | 22.69  | 4.33   | 5.05  | 75%                         |
| CD4-L14-E51                 | 0.04                                        | 1.01  | 42.31 | 0.98      | 3.10  | >50   | 24.49 | >50   | 5.22  | 11.21  | 36.27  | >50   | 2.68      | 35.92  | 5.84   | 7.64  | 75%                         |
| CD4-L17-E51                 | 0.47                                        | 2.46  | >50   | 0.05      | 7.26  | >50   | >50   | >50   | 17.61 | 26.21  | >50    | >50   | 8.08      | >50    | 16.87  | 5.23  | 50%                         |
| CD4-218.3-E51               | 0.95                                        | 2.39  | 7.24  | 2.21      | 7.08  | 26.25 | 9.42  | 32.14 | 5.16  | 4.18   | 5.66   | 22.52 | 3.60      | 19.73  | 5.09   | 8.40  | 100%                        |
| eCD4-Ig                     | 0.01                                        | 0.26  | 2.05  | 0.19      | 0.97  | 23.67 | 8.84  | 47.19 | 2.08  | 4.95   | 1.03   | 35.20 | 2.07      | 12.98  | 7.30   | 4.75  | 100%                        |
| eCD4-Ig <sup>min2</sup>     | 0.03                                        | 0.39  | 3.78  | 0.22      | 1.54  | 27.36 | 14.22 | 70.87 | 2.34  | 7.19   | 1.83   | 38.18 | 3.18      | 16.05  | 10.18  | 6.49  | 100%                        |
| eCD4-Ig <sup>Q46Amim2</sup> | 0.02                                        | 0.25  | 0.69  | 0.20      | 0.89  | 23.70 | 7.45  | 81.38 | 4.89  | 2.07   | 98.69  | >104  | 103.0     | 70.15  | >104   | 10.65 | 83%                         |
| CD4-218.3-E51-mim2          | 0.34                                        | 2.64  | 29.46 | 14.70     | 0.38  | 7.83  | 3.38  | 3.30  | 2.98  | 4.88   | 2.22   | 4.00  | 44.17     | 0.76   | 6.22   | 3.92  | 100%                        |
| CD4-218.3-E51-T20           | 1.75                                        | 8.75  | 4.45  | 4.64      | 7.86  | 14.62 | 14.15 | 23.38 | 5.27  | 8.78   | 6.33   | 11.55 | 1.40      | 3.91   | 11.12  | 7.58  | 100%                        |

<sup>a</sup>Geometric mean calculations include only values from SIVcpz and SIVgor strains that reached an IC<sub>50</sub> at the highest concentration tested

<sup>b</sup>Includes only SIV strains
