# Supplementary figures and images for: Neutralization Properties of Simian Immunodeficiency Viruses Infecting Chimpanzees and Gorillas
Source: PubMed Central journal article supplement — mBio. 2015 Apr 21;6(2):e00296-15. doi: 10.1128/mBio.00296-15 (PMC4453581; doi:10.1128/mbio.00296-15), 2015-04-21

# Figure S2

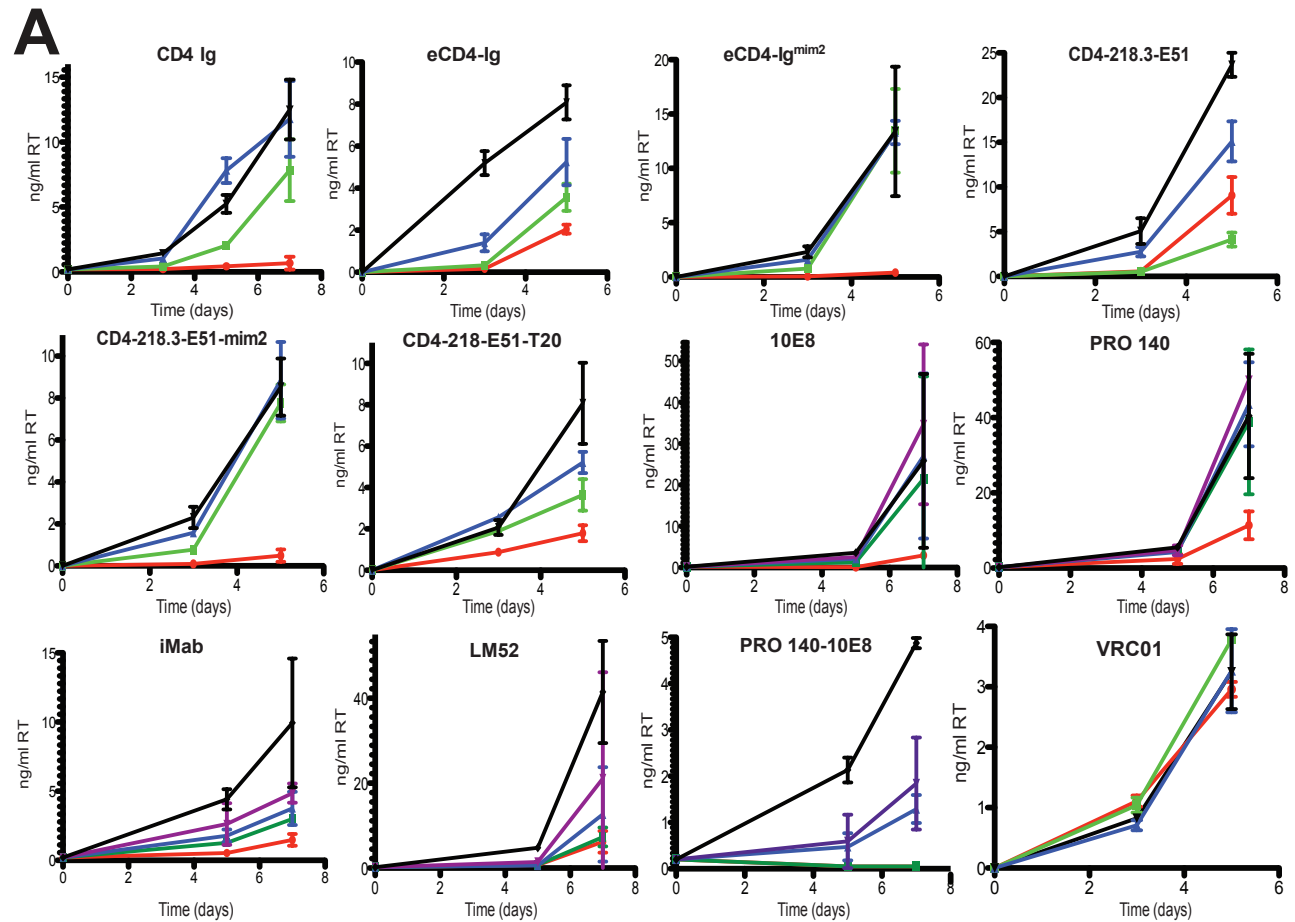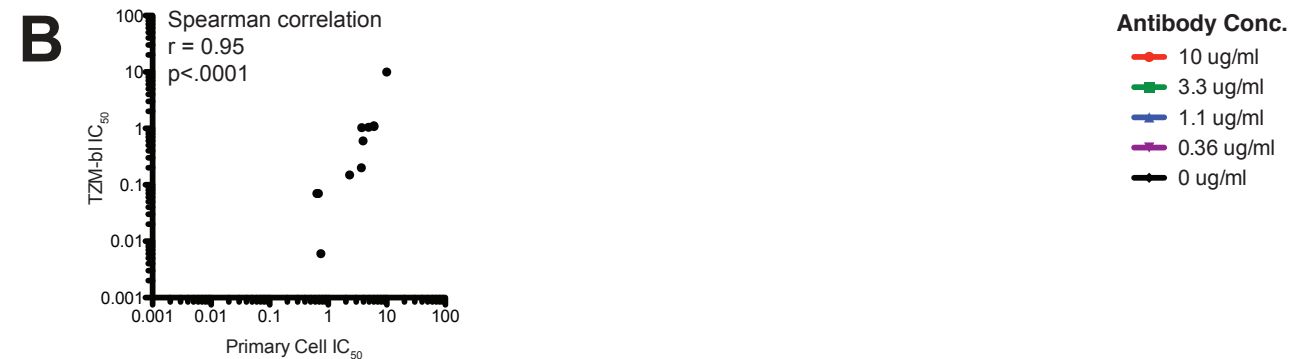

Supplement: mbo002152274sf2.pdf [file mbo002152274sf2.pdf]
